# Supplementary material for: Regulation of iron homeostasis by the p53-ISCU pathway
Source: PubMed Central journal article supplement (PMC4642350; doi:10.1038/srep16497), 2015-11-12
Supplement: srep16497-s1.pdf [file srep16497-s1.pdf]

## Supplementary Information

### Regulation of iron homeostasis by the p53-ISCU pathway

Yuki Funauchi<sup>1,5</sup>, Chizu Tanikawa<sup>1</sup>, Paulisally Hau Yi Lo<sup>1</sup>, Jinichi Mori<sup>1</sup>, Yataro Daigo<sup>2,3</sup>, Atsushi Takano<sup>2,3</sup>, Yohei Miyagi<sup>4</sup>, Atsushi Okawa<sup>5</sup>, Yusuke Nakamura<sup>6</sup> and Koichi Matsuda<sup>1\*</sup>

## Supplementary Figure 1

a

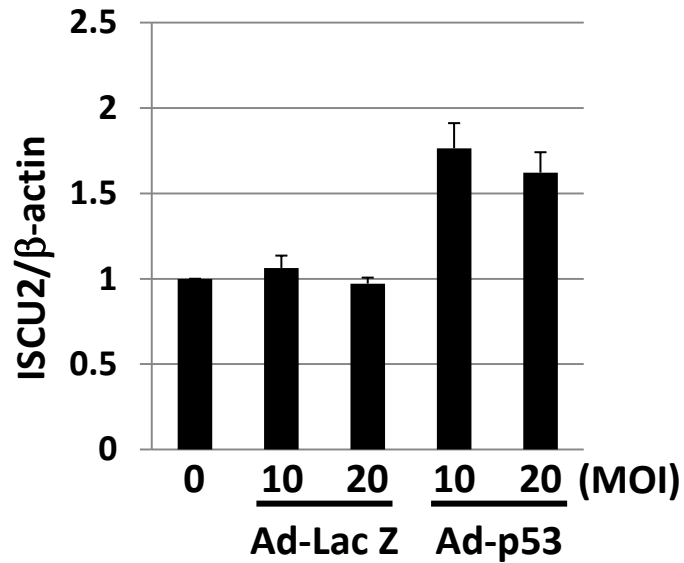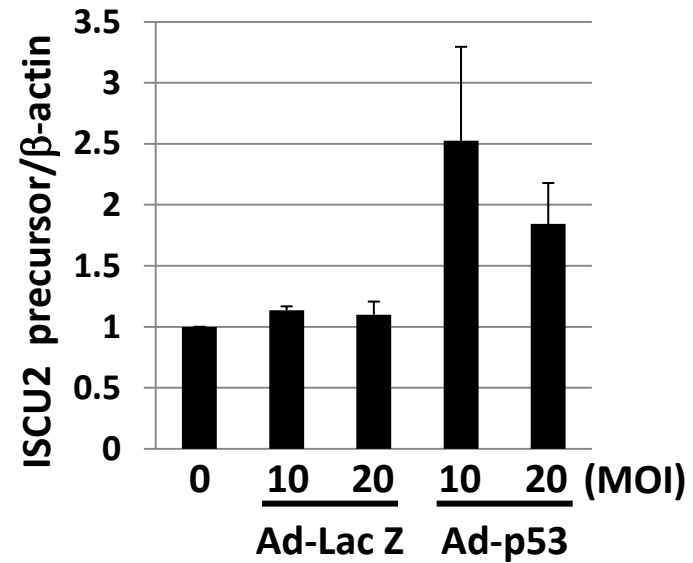

b

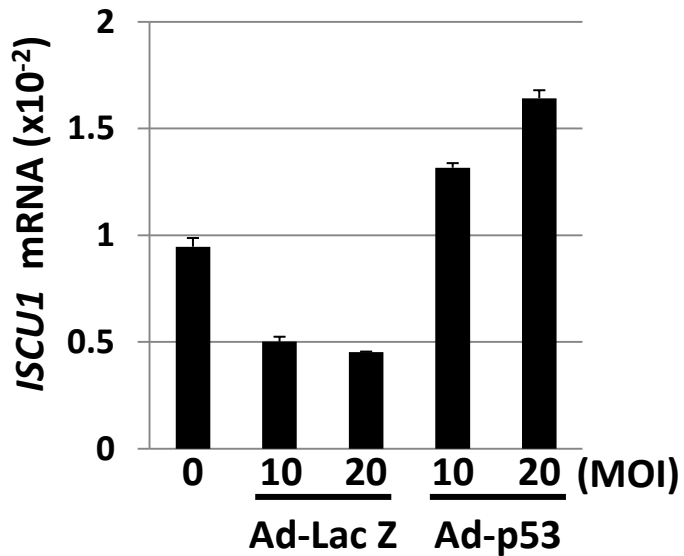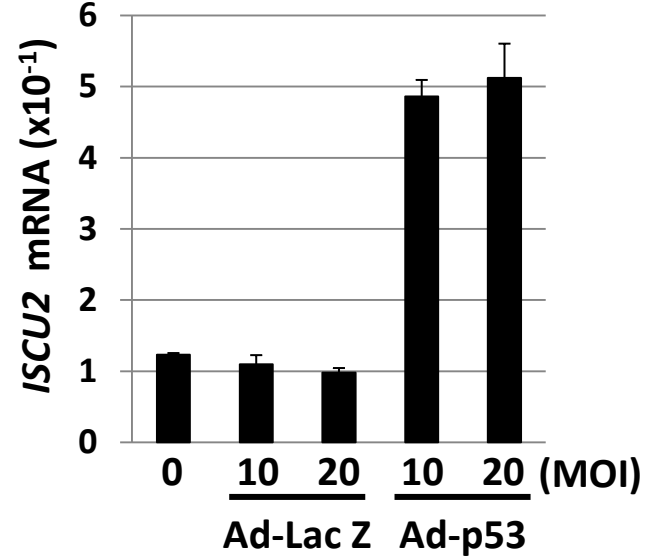

### Supplementary Figure 1. Induction of *ISCU* by p53.

U373 (a) or H1299 (b) cells were infected with adenovirus expressing p53 (Ad-p53) or LacZ (Ad-LacZ) at a multiplicity of infection (MOI) of 10 or 20. (a) Protein expressions of ISCU2 and ISCU2 precursor from Fig. 1b were quantified using Image Quant TL Analysis Toolbox (GE healthcare life science, Piscataway, NJ, USA) according to the manufacturer's instructions.  $\beta$ -actin was used for the normalization of expression levels. Untreated cells were taken as 1. Error bars represent S.D. (n = 3). (b) *ISCU1* and *ISCU2* expression were analyzed by quantitative PCR. *ACTB* was used for the normalization of expression levels. Error bars represent S.D. (n = 3).

# Supplementary Figure 2

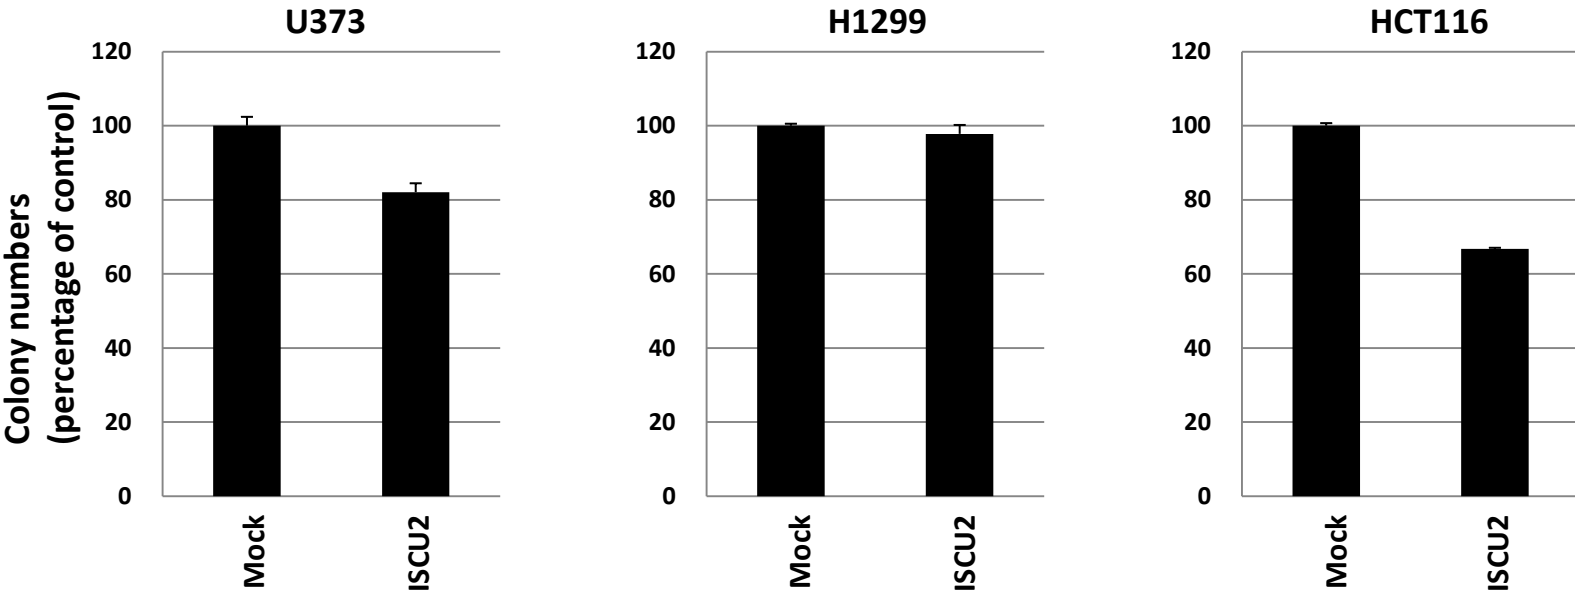

## Supplementary Figure 2. Cell proliferation after overexpression of ISCU.

Colony formation assay was carried out using U373MG, H1299, and HCT116 cells. Cells were transfected with plasmids expressing mock or ISCU2, and were cultured in the presence of geneticin (0.8, 0.8, and 0.5 mg/ml for U373MG, H1299, and HCT116 cells, respectively) for 2 weeks. The number of colonies was quantified using the Image J software.

## Supplementary Figure 3

a

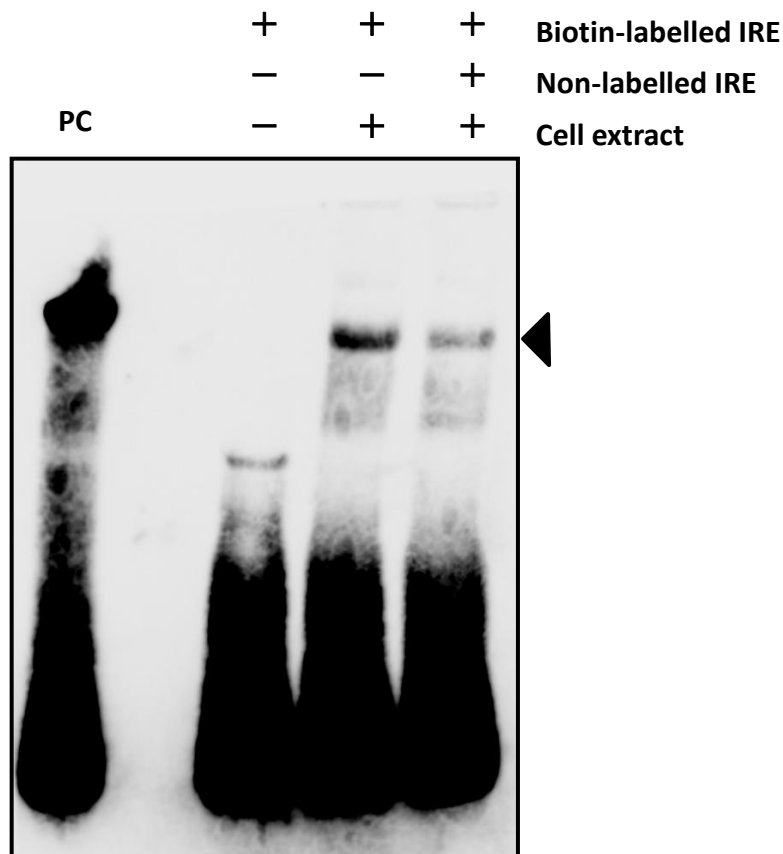

b

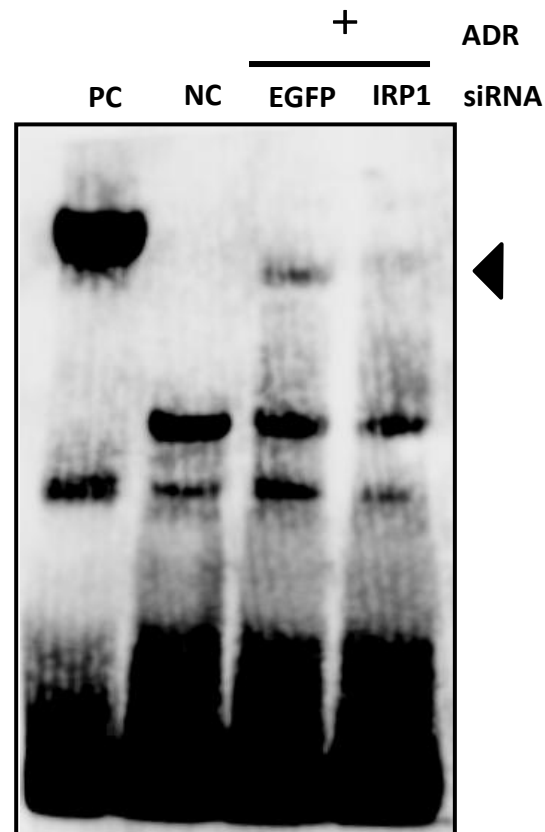

c

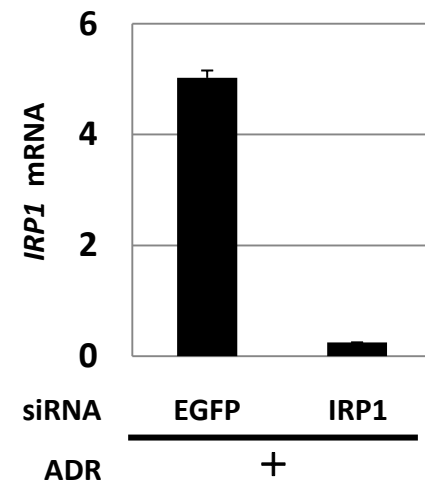

### Supplementary Figure 3. RNA-EMSA using biotin-labelled or non-labelled probe containing IRE in the 5' UTR of *FTH1* mRNA.

(a) HCT116 cells were treated with ADR. After 36 h, cytosolic cellular fractions were incubated with each probe for 30min, and RNA-EMSA was performed. (b) Twenty-four hours after transfection of each siRNA, HCT116 cells were treated with ADR. After 36 h, cytosolic cellular fractions were incubated with probe for 30min, and RNA-EMSA was performed. The arrowhead indicates protein-RNA complex. The biotin-labelled probe was incubated with cytosolic liver extract (PC) or without protein extract (NC). (c) At 24 h after transfection of each siRNA, HCT116 cells were treated with adriamycin (ADR). At 36 h after treatment, qPCR analysis were performed. EGFP was used as control. *ACTB* was used for the normalization of expression levels. Error bars represent S.D. (n = 3)

## Supplementary Figure 4

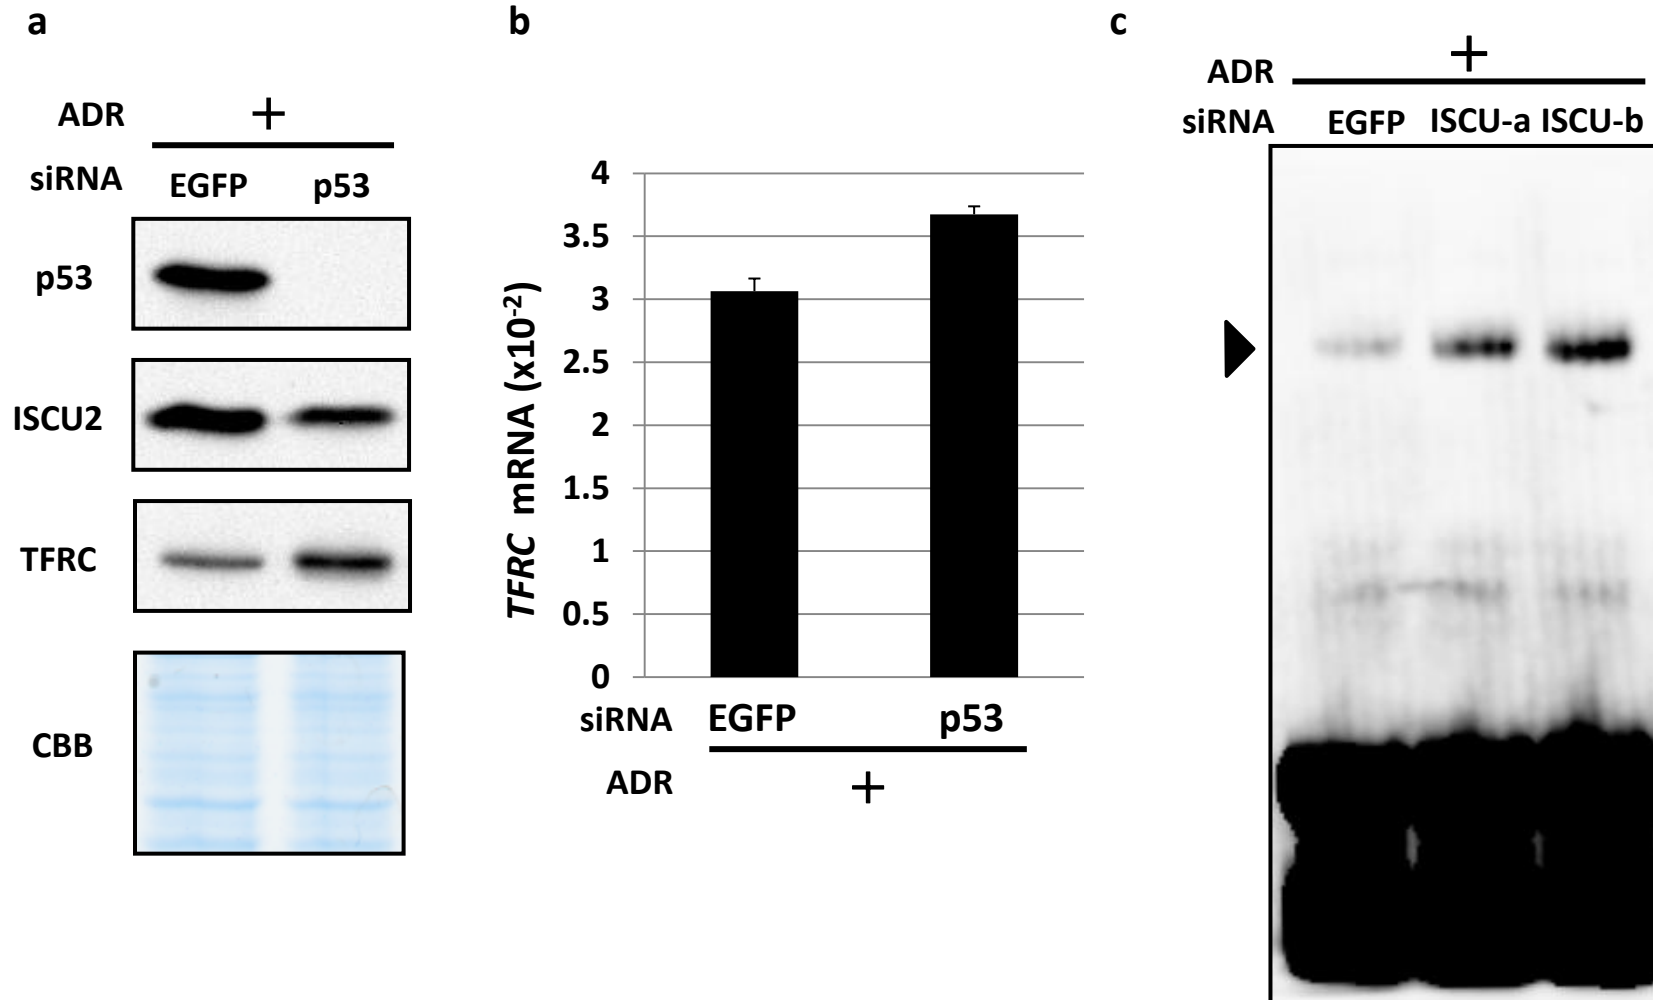

### Supplementary Figure 4. Regulation of TFRC by p53-ISCU pathway.

(a) and (b) At 24 h after transfection of each siRNA, HCT116 (p53 wild-type) cells were treated with adriamycin (ADR). At 36 h after treatment, cells were subjected to western blot analysis (a) or qPCR analysis (b). siRNA against EGFP was used as control. CBB staining was shown for loading control (a). *ACTB* was used for the normalization of expression levels (b). Error bars represent S.D. (n = 3). (c) At 24 h after transfection of each siRNA, HCT116 cells were treated with ADR. At 36 h after treatment, cytosolic fractions of cells were incubated with TFRC probe for 30 min and RNA EMSA was performed. Arrowhead indicates protein-RNA complex.

Supplementary Figure 5

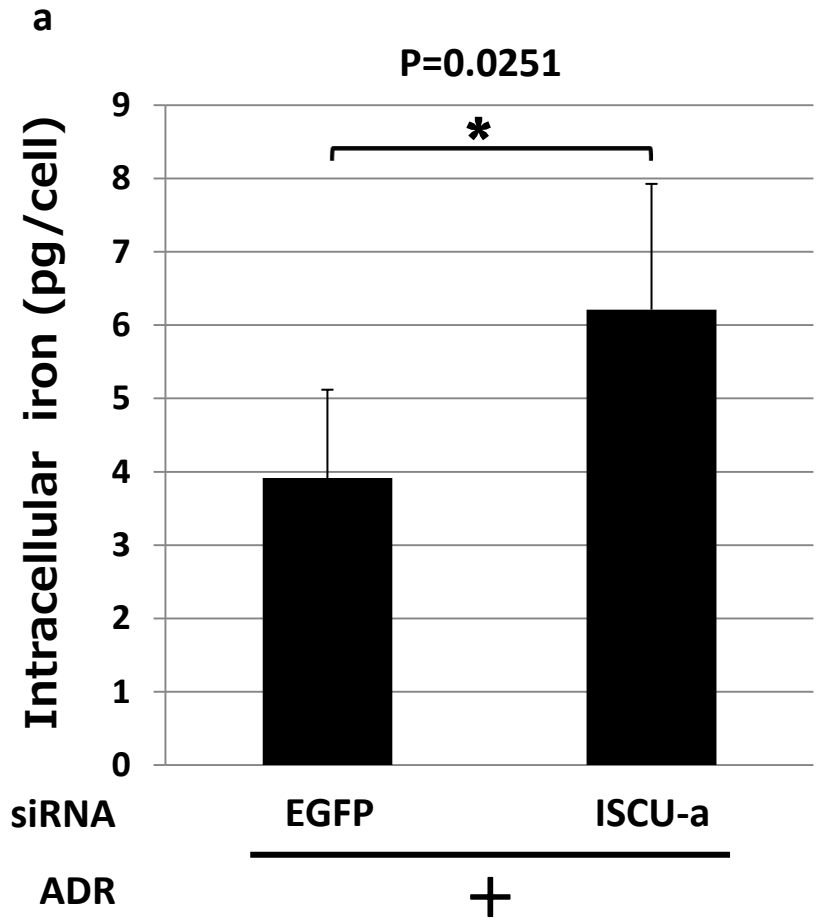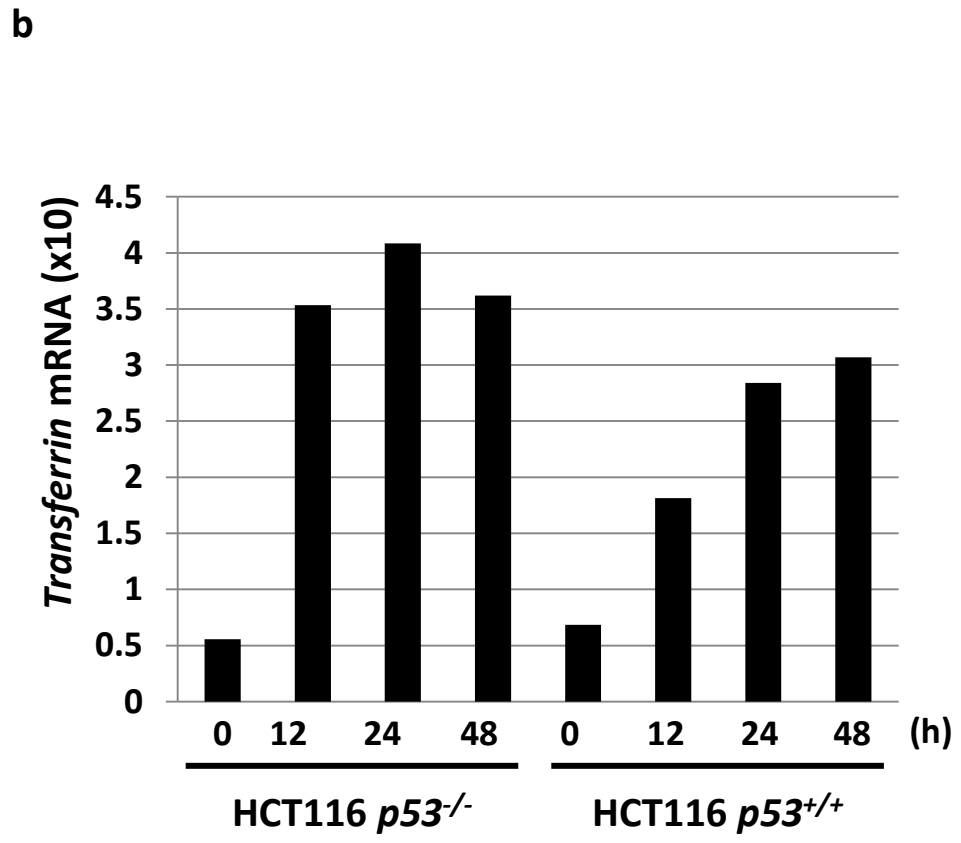

**Supplementary Figure 5. ISCU modulated intracellular iron level.**

(a) At 24 h after transfection of each siRNA, HCT116 cells were treated with 2ug/ml of Adriamycin (ADR) for 2 h. At 36 h after treatment, cells were collected to measure intracellular level. Error bars represent SD (n = 6). \*, P < 0.05. (b) Expression of *transferrin* mRNA in ADR-treated HCT116 p53<sup>-/-</sup> or HCT116 p53<sup>+/+</sup> cells.

# Supplementary Figure 6

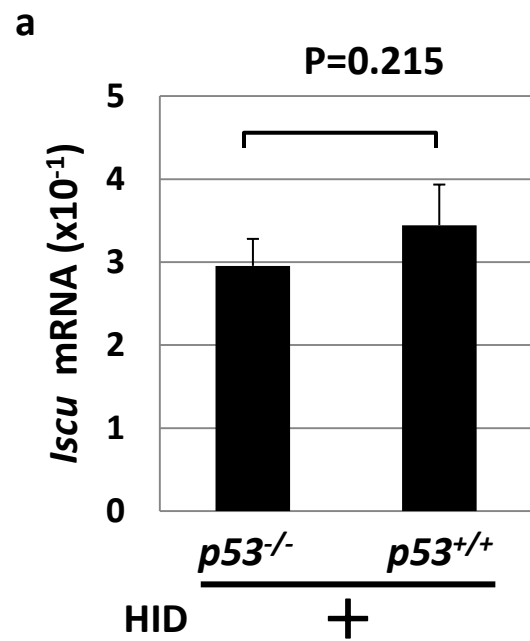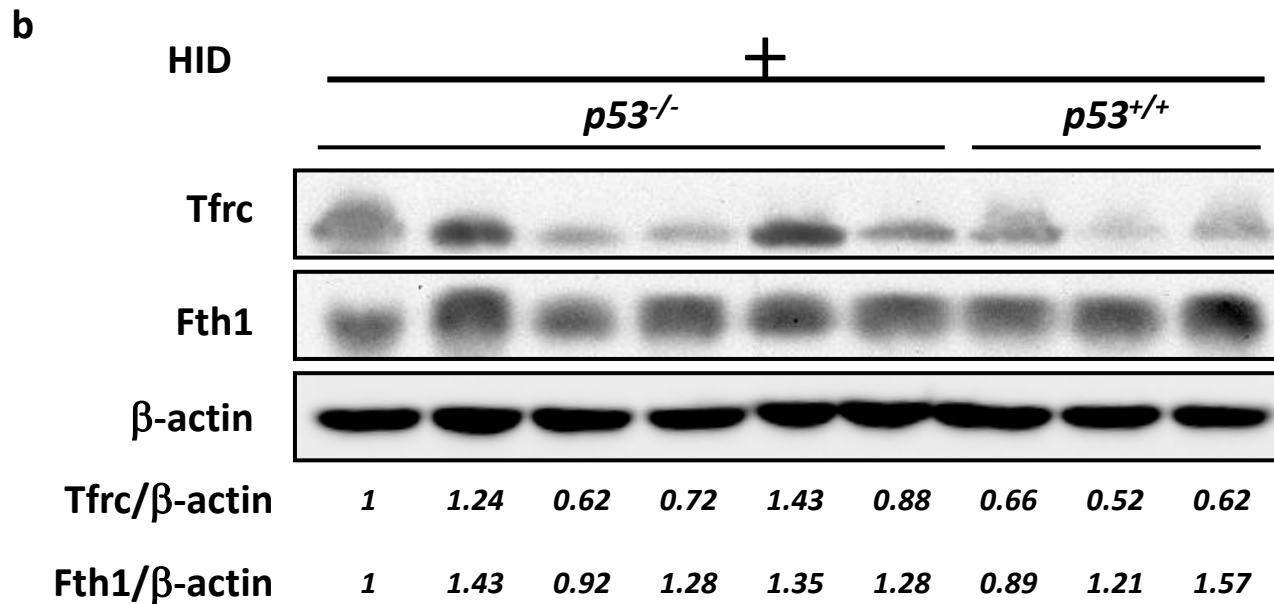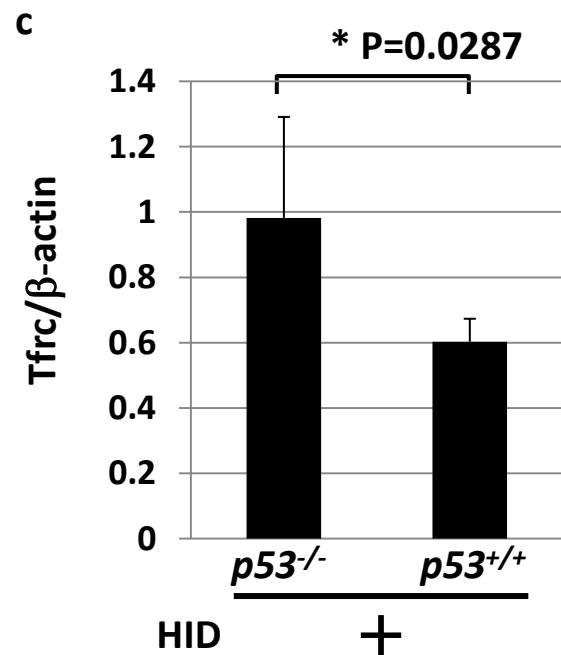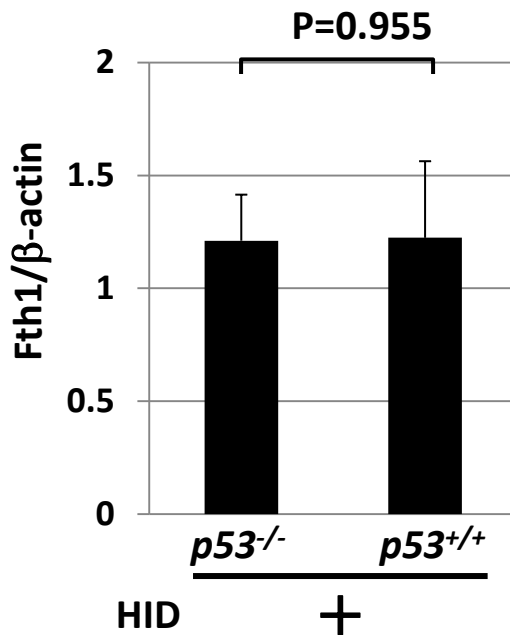

**Supplementary Figure 6. Expression of *Iscu*, *Tfr1*, and *Fth1* in mouse liver tissues after high-iron diet.** *p53*<sup>+/+</sup> (n = 3) or *p53*<sup>-/-</sup> (n = 6) mice were fed with a high-iron diet (HID) at 6 weeks of age for 3 weeks. At 9 weeks of age, liver tissues were collected for quantitative PCR (qPCR) analysis of *Iscu* mRNA (a) or western blot analysis (b). *Tfr1*, *Fth1*, and  $\beta$ -actin expressions from (b) were measured using Image Quant TL Analysis Toolbox (GE healthcare life science, Piscataway, NJ, USA) according to the manufacturer's instructions (c).  $\beta$ -actin was used for the normalization of expression levels. First sample was taken as 1. Error bars represent S.D. \*,  $P < 0.05$ .

# Supplementary Figure 7

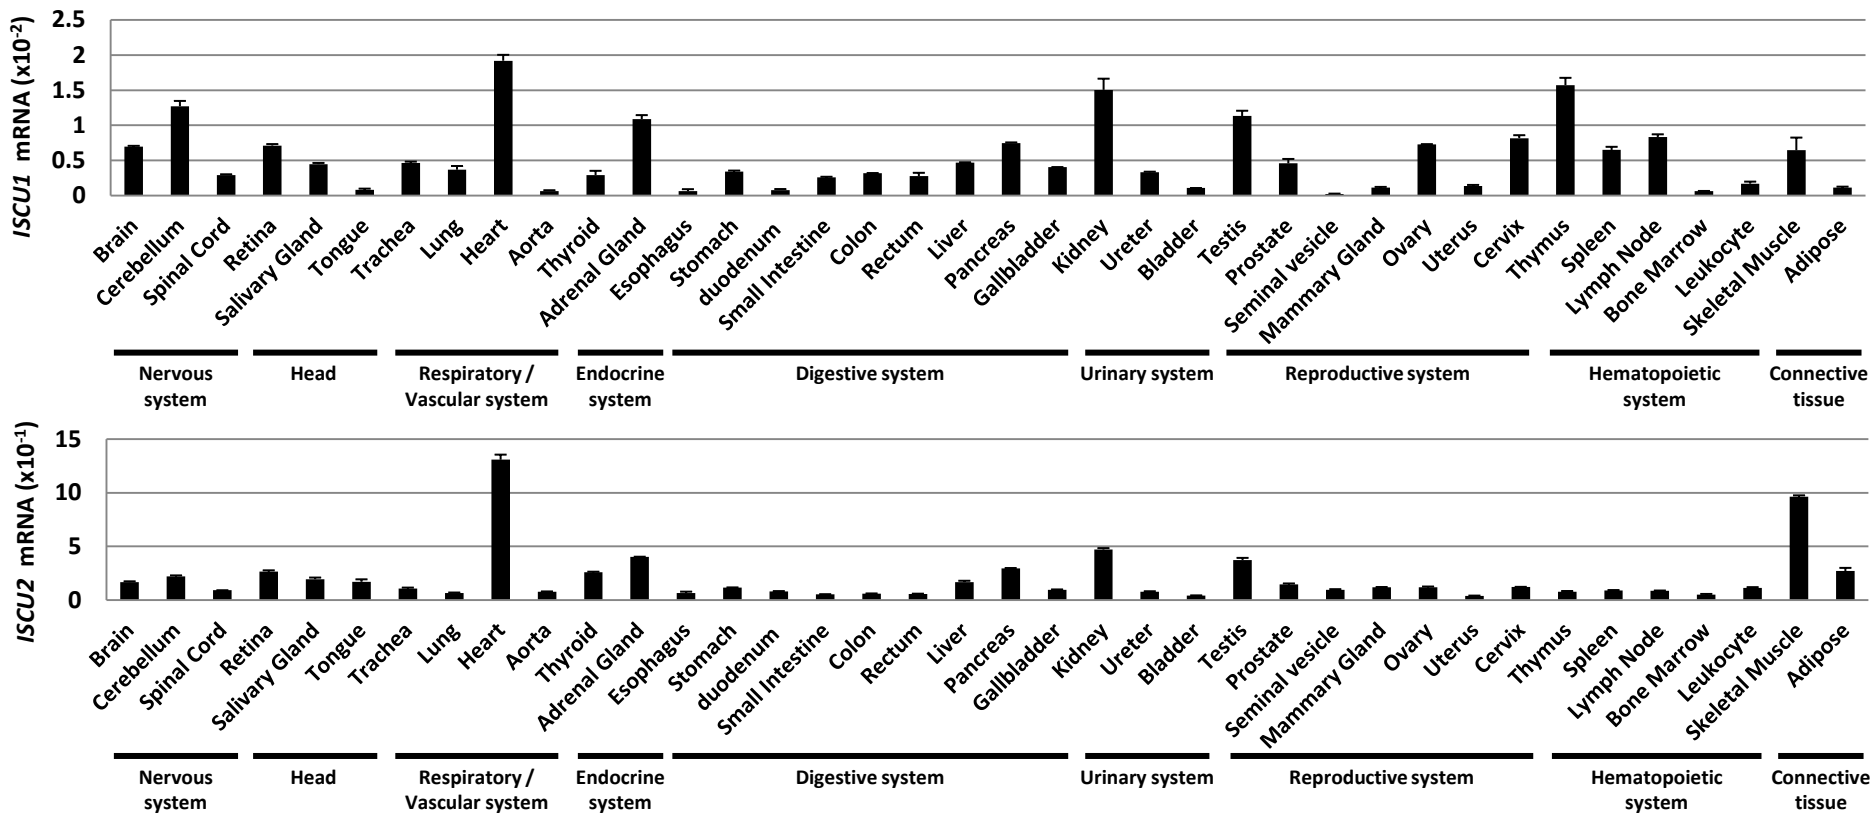

Supplementary Figure 7. Expression of *ISCU* in normal human tissues. qPCR analysis of *ISCU* in 38 normal human tissues. *ACTB* was used for the normalization of expression levels.



# Supplementary Figure 8

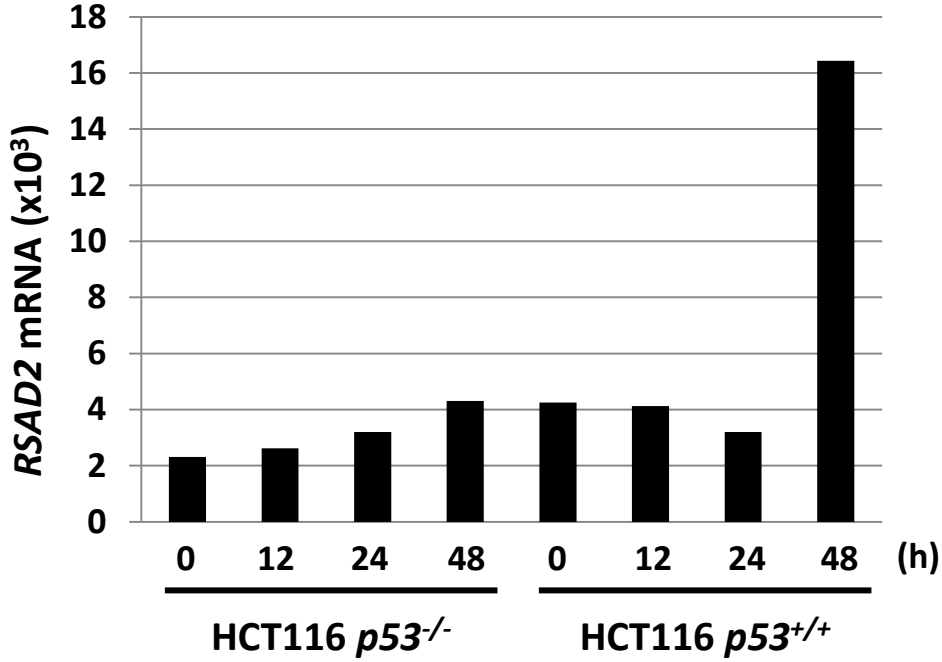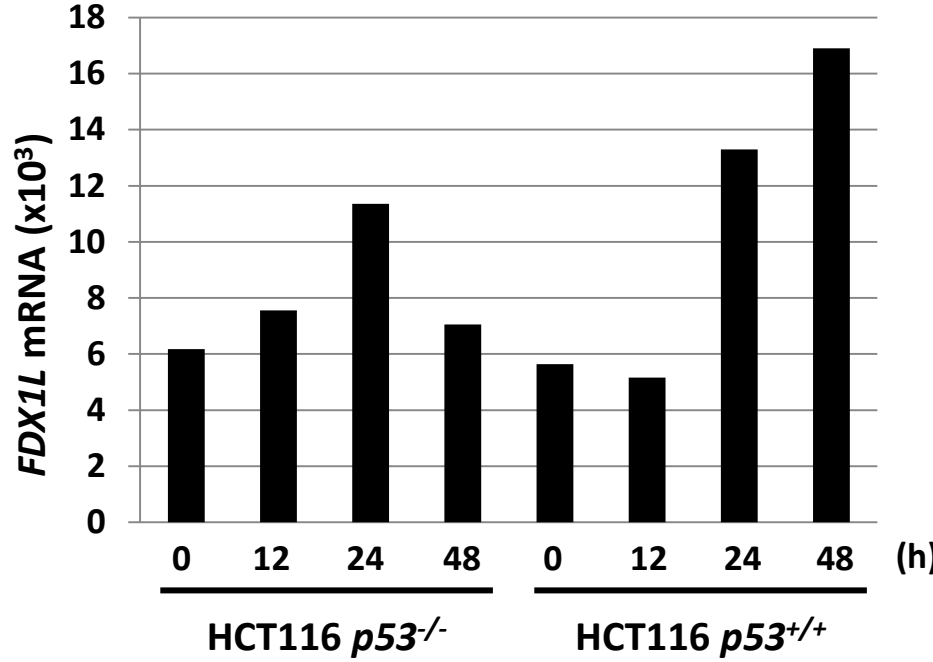

Supplementary Figure 8. The regulation of Fe-S proteins by p53. Expression of *FDX1L* and *RSAD2* mRNA in ADR-treated HCT116 p53<sup>-/-</sup> or HCT116 p53<sup>+/+</sup> cells.

# Supplementary Table 1. Sequences of DNA and RNA oligonucleotides.

| Cloning                                     | Forward                                                   | Reverse                                                       |
|---------------------------------------------|-----------------------------------------------------------|---------------------------------------------------------------|
| ISCU1                                       | AAAGAATTCTCACAATGGTTCTCATTGA                              | AAACTCGAGGAGGGCTTTCTTCTCTGCCT                                 |
| ISCU2                                       | AAAGAATTCGGCAAGATGGCGGCGGCTGG                             | AAACTCGAGGAGGGCTTTCTTCTCTGCCT                                 |
| mutant ISCU                                 | GATGAAAAGGGGAAAATCGTAGACGCACGCTTCAAAACAT<br>TTGGCTGTGGTTC | CAC TTGAATCTGTAATTCATAACATCCCCGCATGCTGGAG<br>CCCCCACCAGTCCAGT |
| siRNA oligonucleotides                      | sense                                                     | antisense                                                     |
| siISCU-a                                    | UGUGGUGACGUAAUGAAUUTT                                     | AUUUCAUUACGUCACCACATT                                         |
| siISCU-b                                    | GAUUGUGGAUGCUAGGUUUTT                                     | AAACCUAGCAUCCACAAUCTT                                         |
| siEGFP                                      | GCAGCACGACUUCUUAAGTT                                      | CUUGAAGAAGUCGUGCUGCTT                                         |
| siISCU1-a                                   | GGUAUCUCAAAUCUGUGAATT                                     | UUCACAGAUUUGAGAUACCTT                                         |
| siISCU1-b                                   | GUCACAAAUGGUUCUCAUUTT                                     | AAUGAGAACCAUUUGUGACTT                                         |
| siISCU1-c                                   | GGUUCUCAUUGACAUGAGUTT                                     | ACUCAUGUCAUUGAGAACCTT                                         |
| siISCU2                                     | UCACAAGAAGGUUGUUGAUTT                                     | AUCAACAACCUUCUUGUGATT                                         |
| si p53                                      | GACUCCAGUGGUAUUCUACTT                                     | GUAGAUUACCACUGGAGUCTT                                         |
| siIRP1                                      | GCCAUUGGAUCCUGUACAATT                                     | UUGUACAGGAUCCAAUGGCTT                                         |
| Quantitative real-time PCR                  | Forward                                                   | Reverse                                                       |
| ISCU                                        | AACACAGATATCGCCAAGGAG                                     | TTTGGGTTCTTGTTTCAATTTGT                                       |
| ISCU1                                       | TCATTGACATGAGTGTAGACCTTTC                                 | CACCAGTCCAGTTCCAACATT                                         |
| ISCU2                                       | ACTCTATCACAAGAAGTTG                                       | CCACAATCTTCCCCTTTTCA                                          |
| FTH1                                        | GCCAGA ACTACCACCAGGAC                                     | CATCATCGCGGTCAAAGTAG                                          |
| TFRC                                        | CAATGATCGTGTATGAGAGTG                                     | TAAAGCTGGCAGCGTGTG                                            |
| ACTB                                        | CCCTGGAGAAGAGCTACGAG                                      | TGAAGGTAGTTTCGTGGATGC                                         |
| IRP1                                        | GCAGGCACCACAGACTATCC                                      | CAGCAGCATCAAACACATCA                                          |
| mIscu                                       | CCTGTGAAACTGCACTGCTC                                      | TCTCTGGCTCCTCCTTCTTG                                          |
| mActb                                       | CTAAGGCCAACCGTGAAAAG                                      | ACCAGAGGCATACAGGGACA                                          |
| mWaf1                                       | TCCACAGCGATATCCAGACA                                      | GGACATCACCAGGATTGGAC                                          |
| Gene reporter assay                         | Forward                                                   | Reverse                                                       |
| p53BR                                       | AGGGTCCTGTTGGGACTTGT                                      | CAAAAACATTACGCATGTTGG                                         |
| p53BRmt                                     | GGATTTTTCTTTCTGAGTCCAGGGACA                               | CAAAAGAACCCTGCCTCCTGGGCTGTT                                   |
| mp53BS                                      | ATACAAGCAC                                                | AAGCATACGT                                                    |
| ChIP assay                                  | Forward                                                   | Reverse                                                       |
| Genomic fragment including p53BS            | CTTCGTGCGTCCCAATTTTA                                      | GTGTGTCTGTCCCTGGACTC                                          |
| RNA EMSA                                    | sequences                                                 |                                                               |
| biotinylated IRE from 5' UTR of <i>FTH1</i> | UCUUGCUUCAACAGUGUUUGAACGGAAC                              |                                                               |
| biotinylated IRE from 3' UTR of <i>TFRC</i> | AAUUAUCGGGAACAGUGUUUCCAUAAUU                              |                                                               |

**Supplementary Table 2. Association between ISCU-positivity in hepatocellular carcinoma tissues and patients' characteristics (n=92).**

|                        |              | Total  | Strong expression | Weak expression | Absent expression | P-value                   |
|------------------------|--------------|--------|-------------------|-----------------|-------------------|---------------------------|
|                        |              | n = 92 | n =45             | n = 33          | n = 14            | Strong vs Weak and Absent |
| <b>Gender</b>          |              |        |                   |                 |                   |                           |
|                        | Male         | 69     | 32                | 26              | 11                | 0.4736                    |
|                        | Female       | 23     | 13                | 7               | 3                 |                           |
| <b>Age (years)</b>     |              |        |                   |                 |                   |                           |
|                        | < 65         | 28     | 16                | 8               | 4                 | 0.3667                    |
|                        | 65=<         | 64     | 29                | 25              | 10                |                           |
| <b>Virus Infection</b> |              |        |                   |                 |                   |                           |
|                        | HBV          | 14     | 6                 | 8               | 0                 | 0.3135*                   |
|                        | HCV          | 57     | 27                | 18              | 12                |                           |
|                        | No infection | 21     | 12                | 7               | 2                 |                           |
| <b>pT factor</b>       |              |        |                   |                 |                   |                           |
|                        | T1           | 66     | 27                | 27              | 12                | 0.0202**                  |
|                        | T2-T4        | 26     | 18                | 6               | 2                 |                           |
| <b>p53 staining</b>    |              |        |                   |                 |                   |                           |
|                        | Positive     | 26     | 9                 | 11              | 6                 | 0.107                     |
|                        | Negative     | 66     | 36                | 22              | 8                 |                           |
| <b>Ferritin</b>        |              |        |                   |                 |                   |                           |
|                        | Positive     | 72     | 32                | 26              | 14                | 0.1319                    |
|                        | Negative     | 20     | 13                | 7               | 0                 |                           |

\* HCV and HBV positive vs no infection

\*\*P < 0.05 (Fisher's exact test)
